# Supplementary material for: Redesigning continuing professional development: Harnessing design thinking to go from needs assessment to mandate
Source: PubMed Central journal article supplement (PMC8941037; doi:10.1007/s40037-020-00604-1), 2020-08-12

**Team A**  
*Early career  
working in  
community*

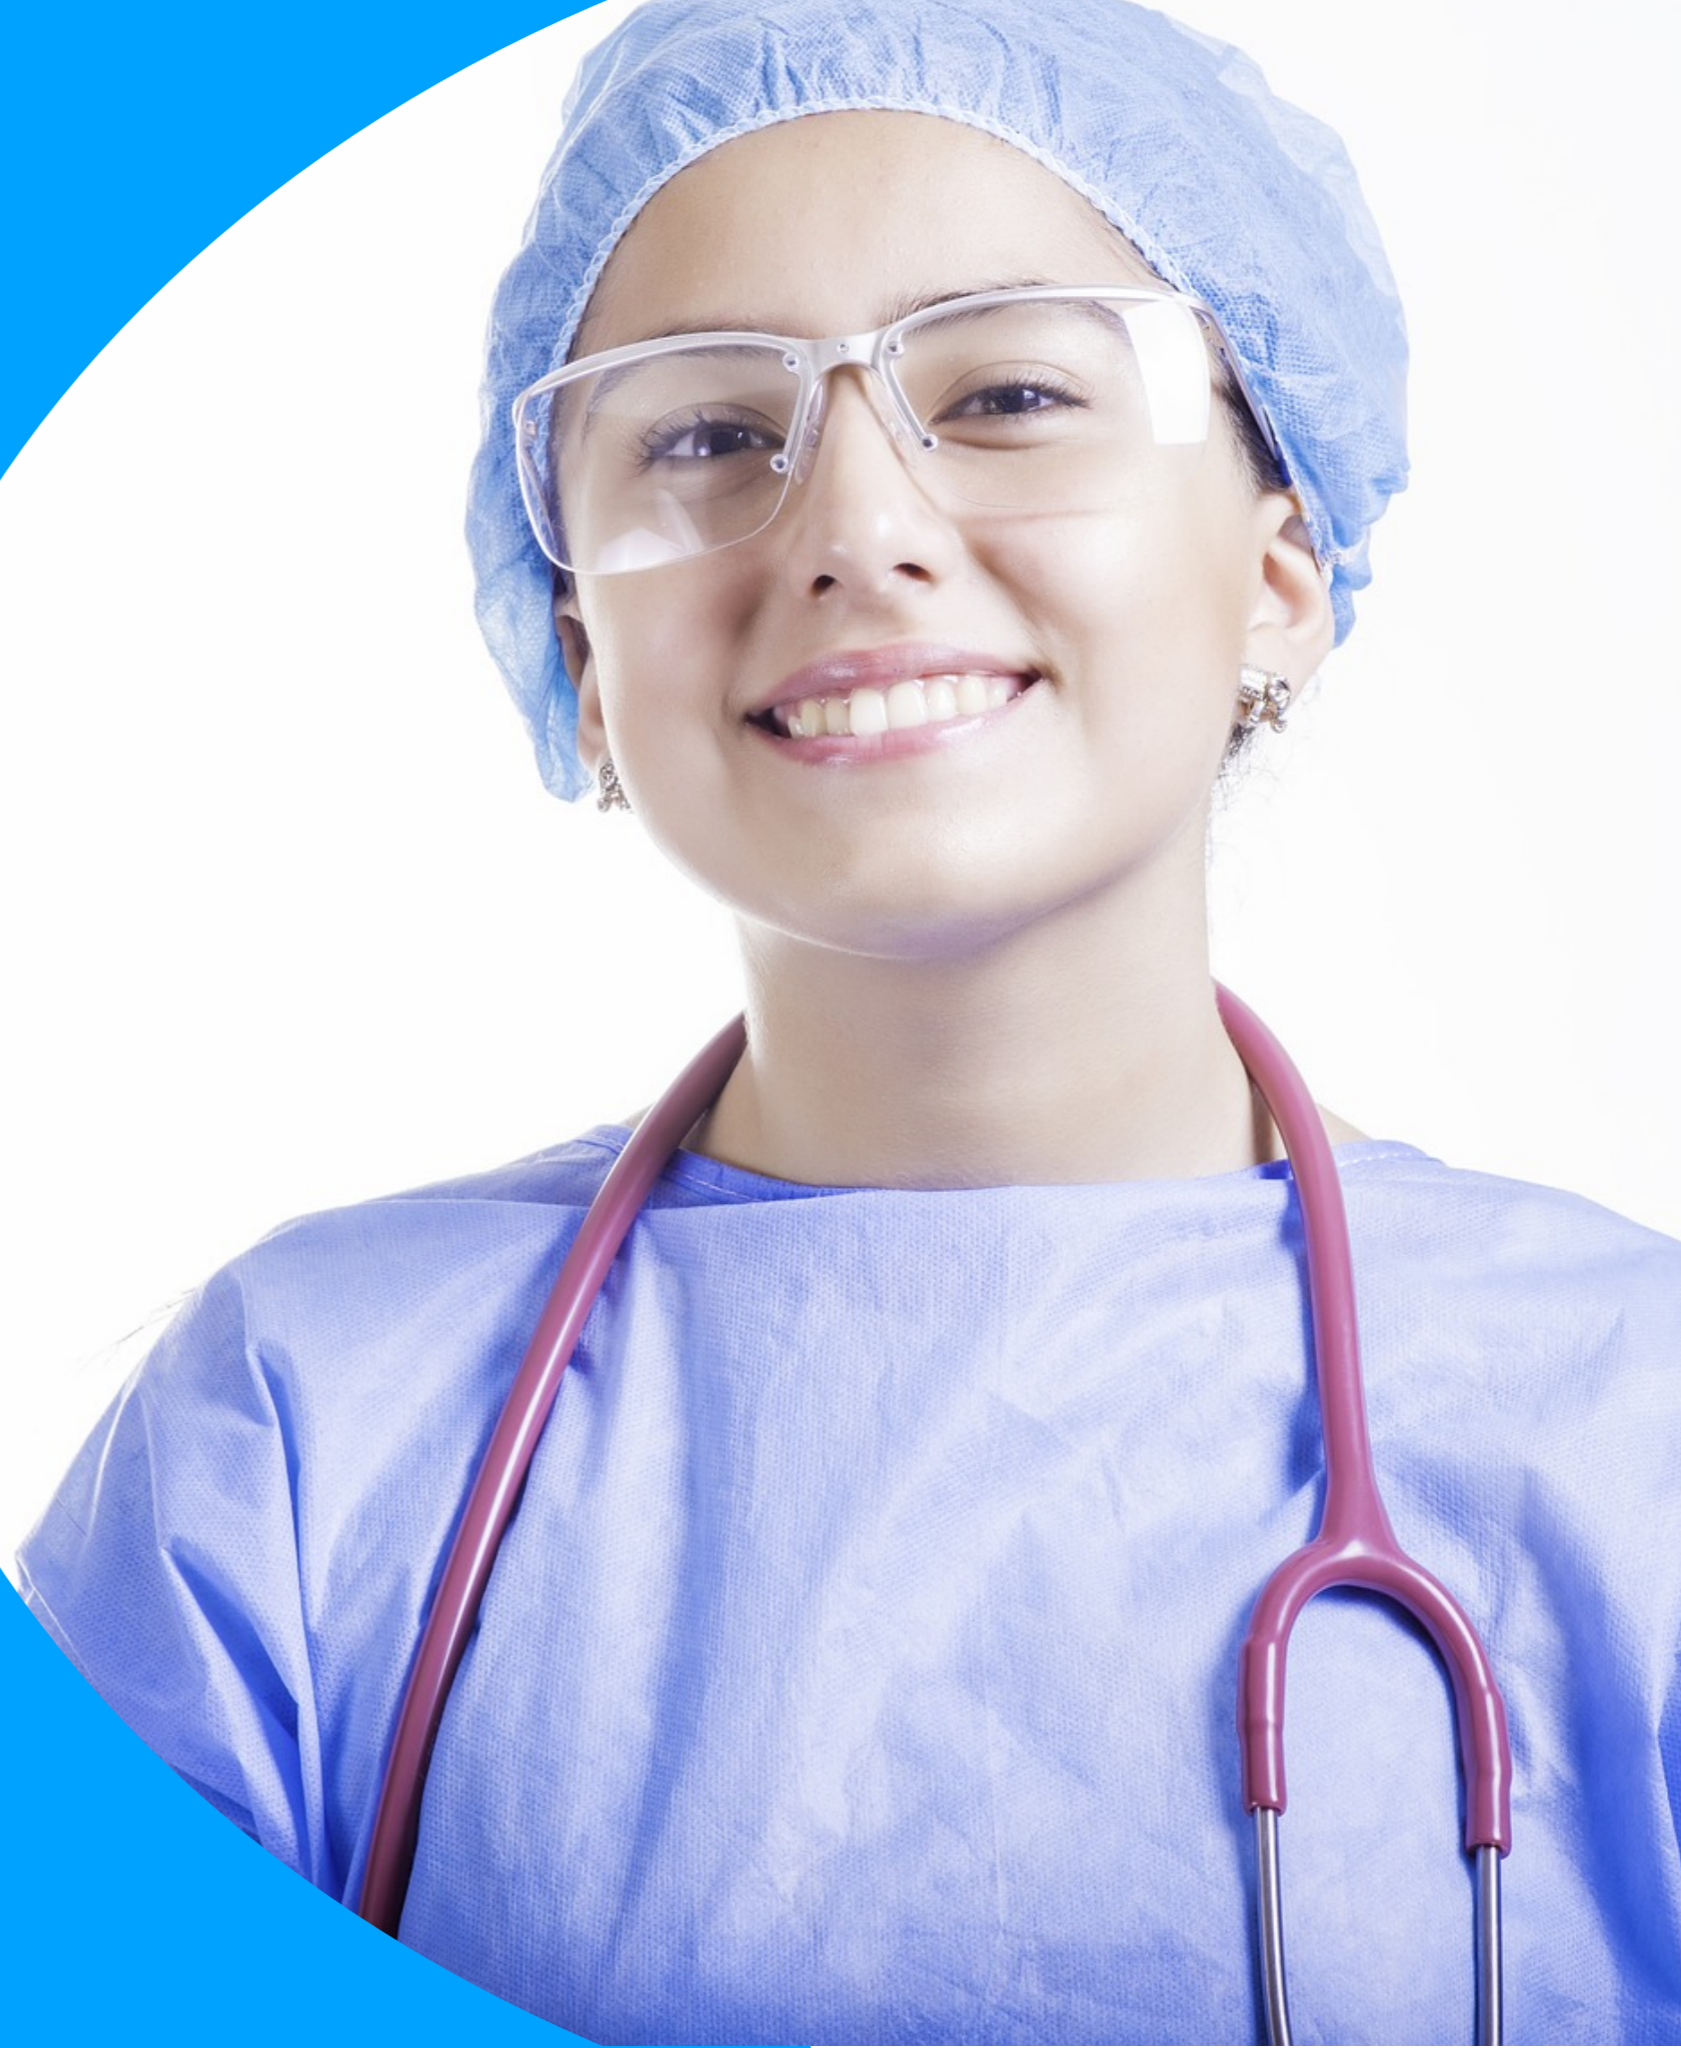

*Photo from Pixabay.*

**Team B**  
*5 years out  
just back from  
a 3 month  
mat leave*

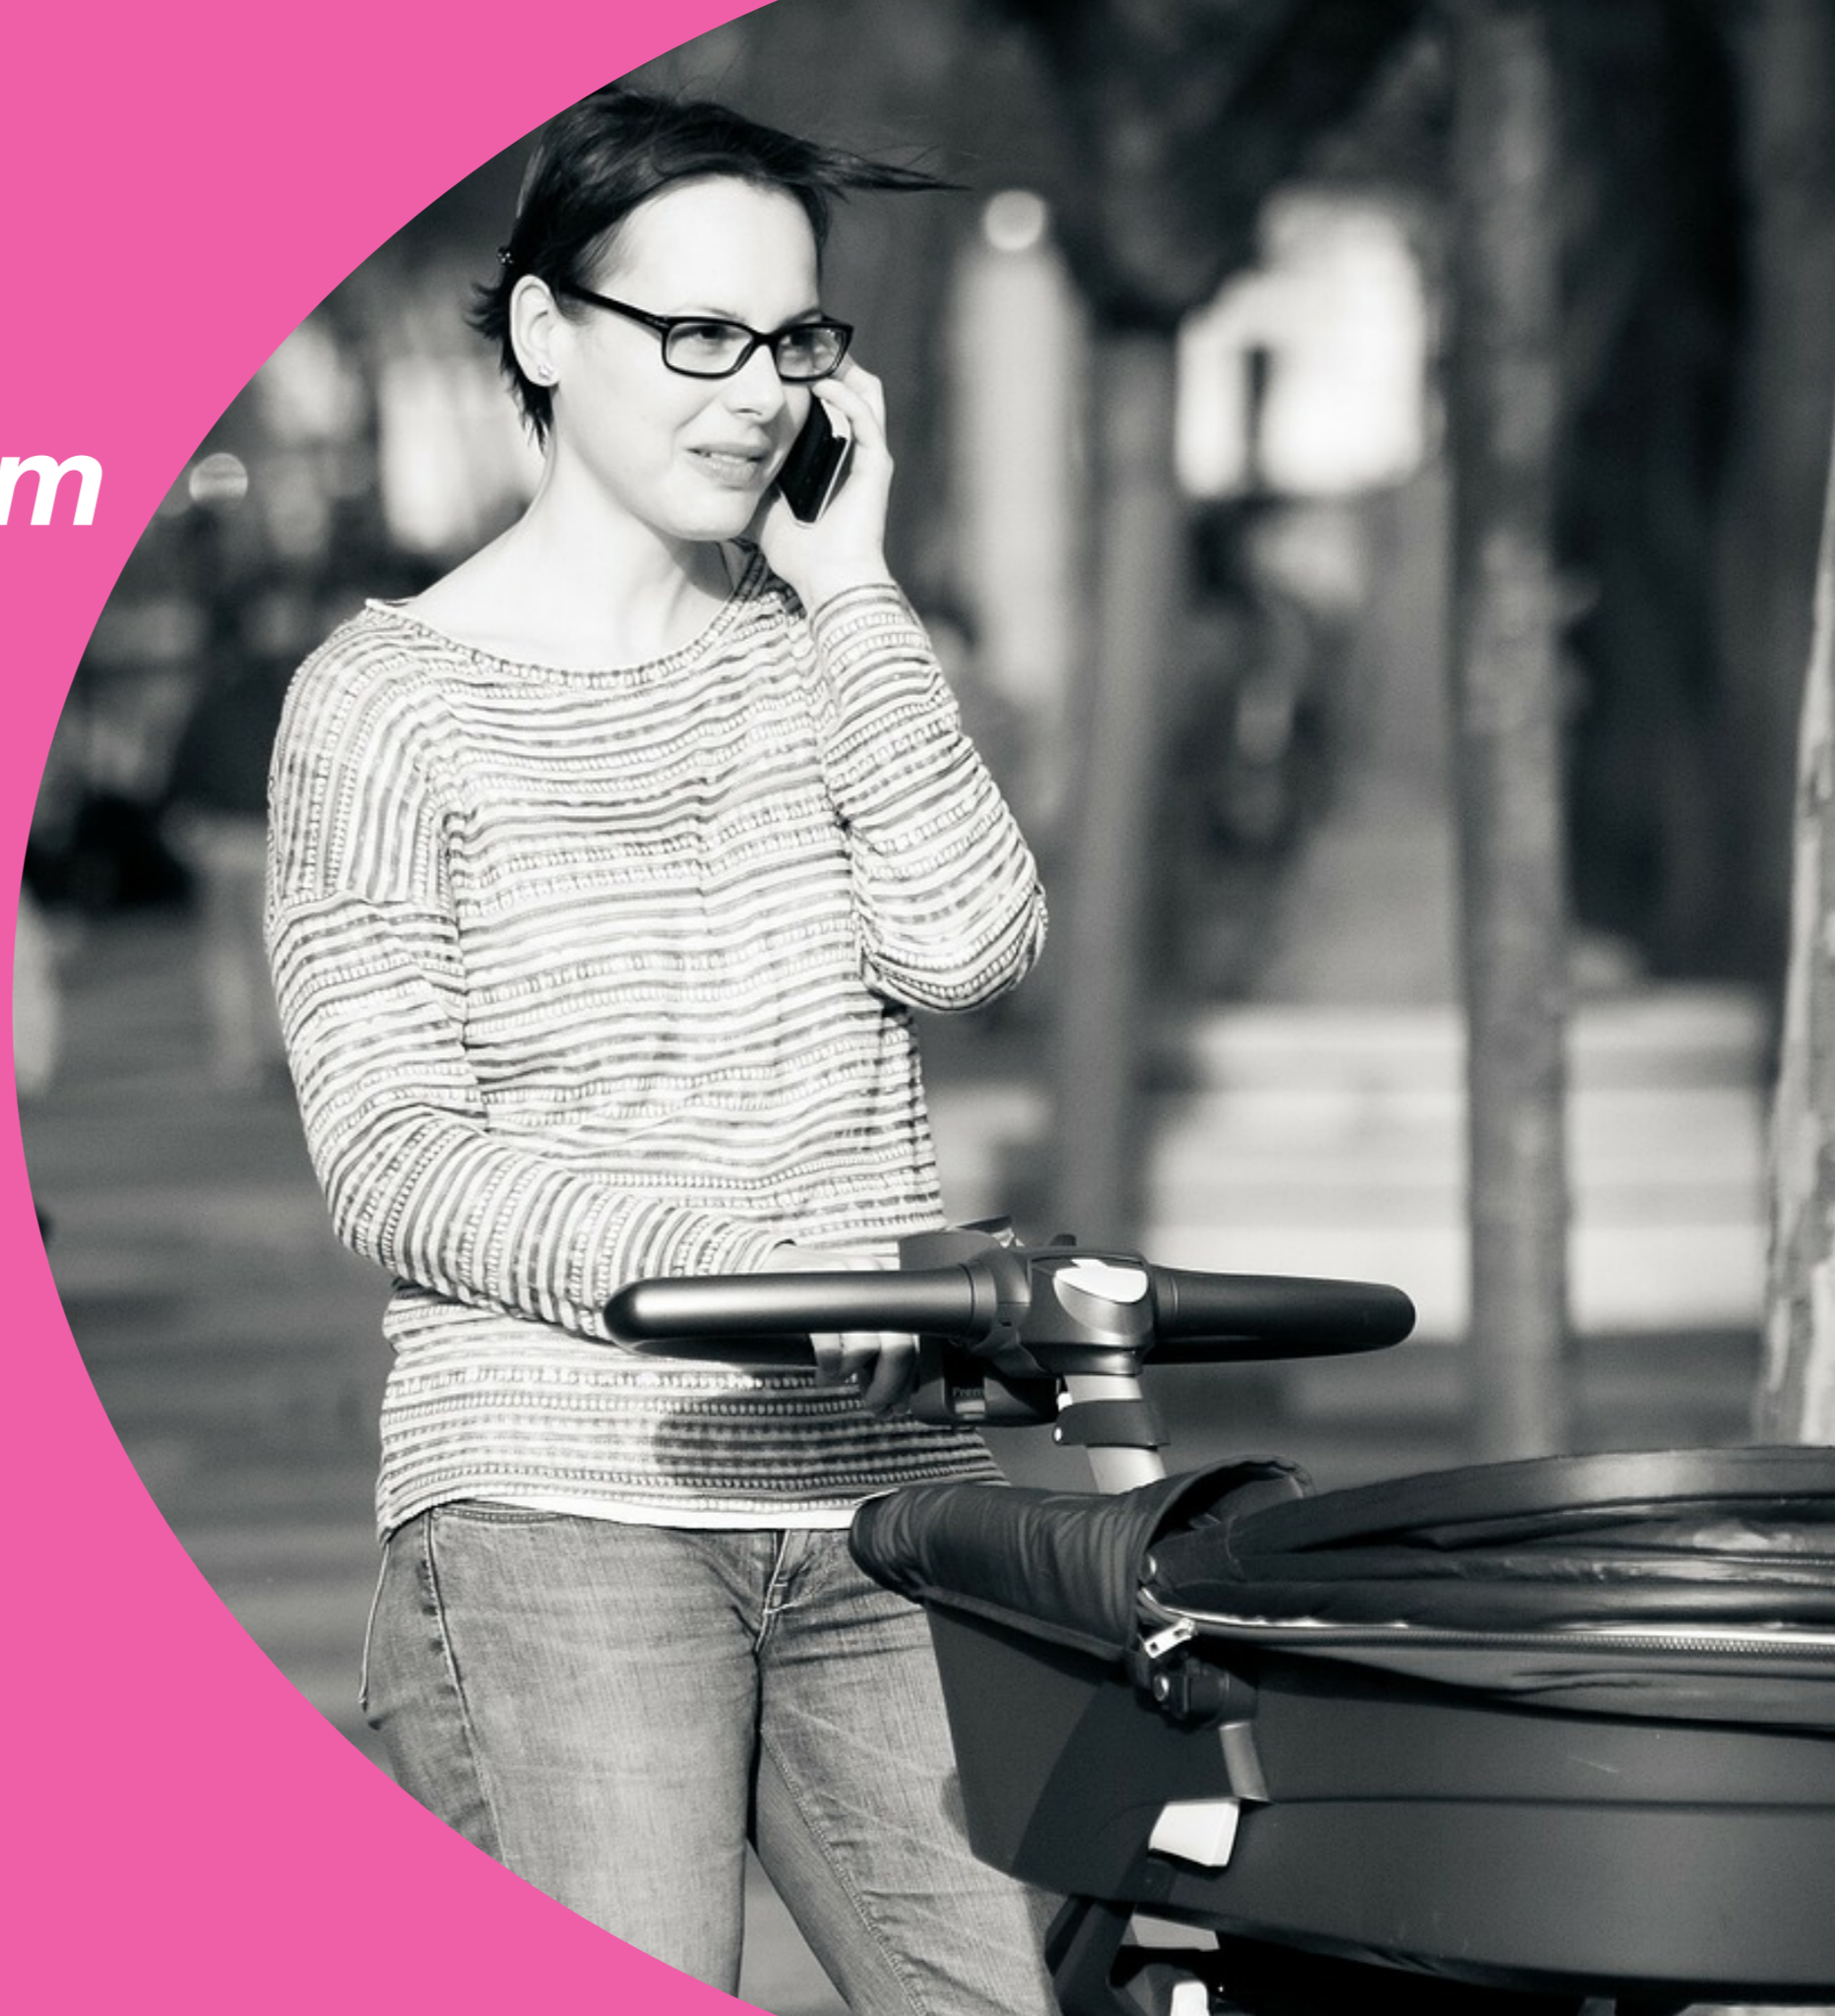

*Photo from Pixabay.*

**Team C**  
***Mid-career,  
academic  
position,  
working  
6-shifts/mo***

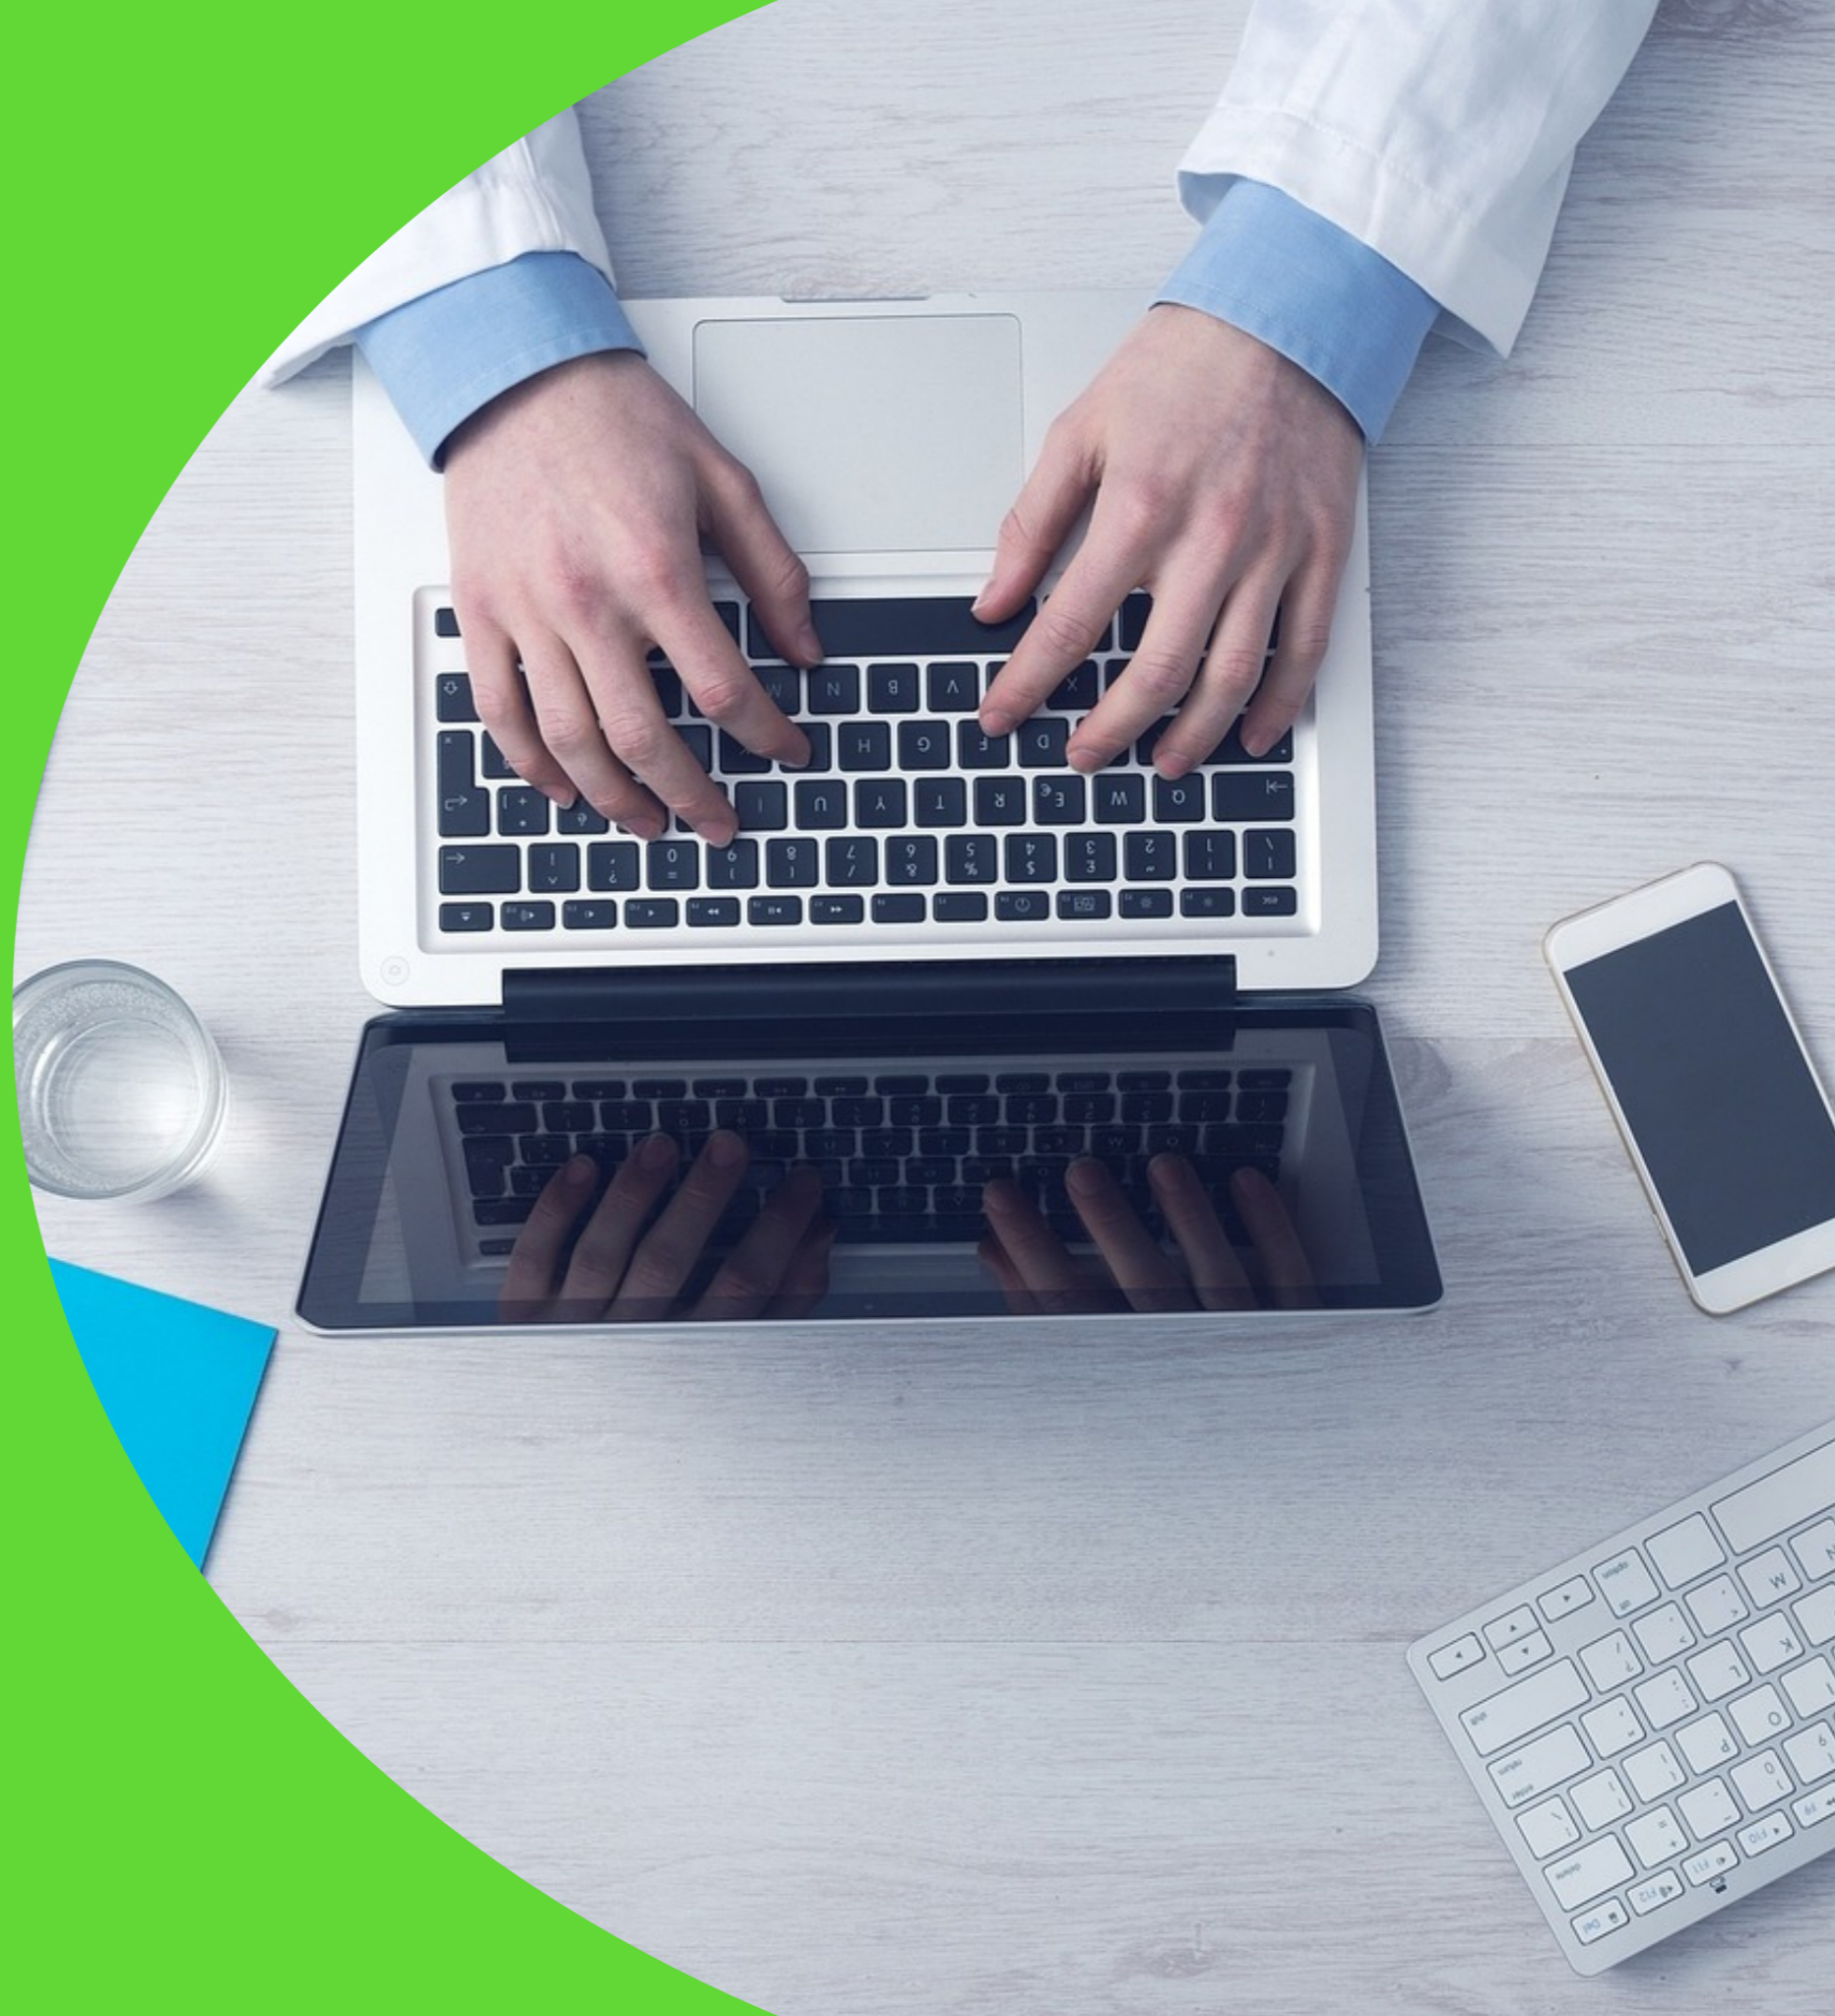

*Photo from Pixabay.*

**Team D**  
***Late-career,  
experienced  
clinician  
looking to  
expand their  
non-clinical  
role***

*Photo from Pixabay.*

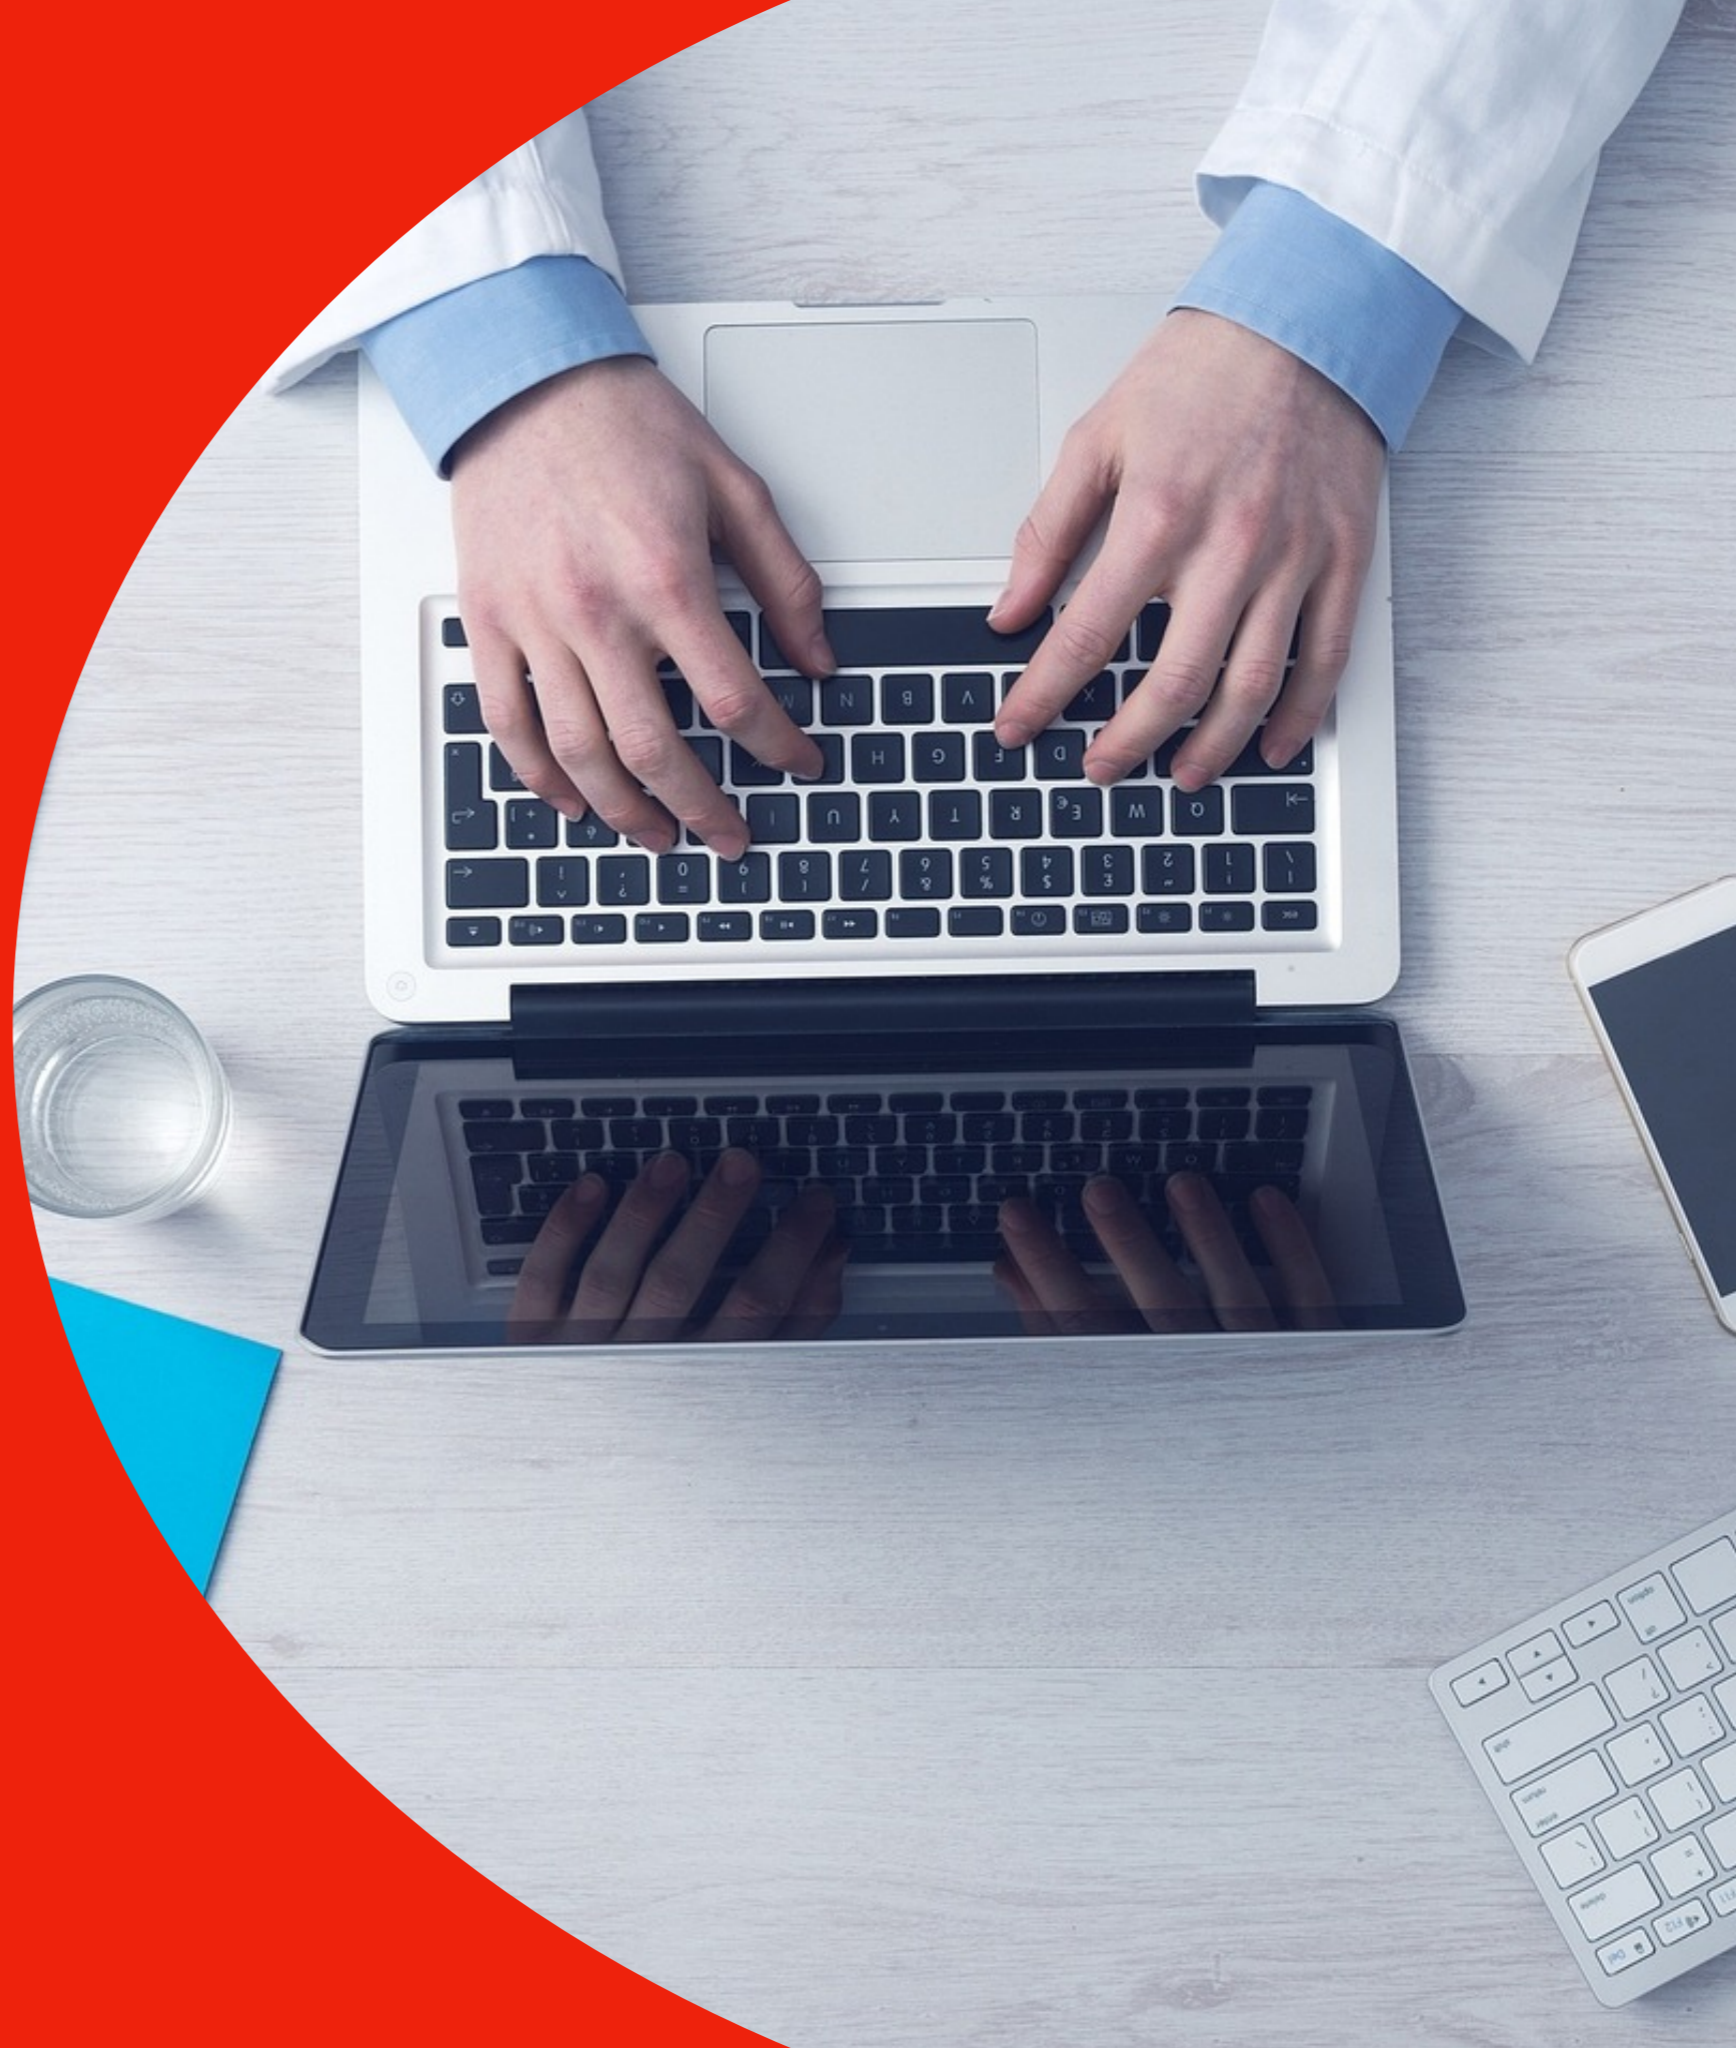

Supplement: 40037_2020_604_MOESM1_ESM.pdf [file 40037_2020_604_MOESM1_ESM.pdf]
